# Supplementary material
Source: PubMed Central journal article supplement (PMC5099076)
Supplement: NIHMS826510-supplement-SI.pdf [file NIHMS826510-supplement-SI.pdf]

## Supplementary Information

### Small-molecule allosteric modulators of the protein kinase PDK1 from structure-based docking

T. Justin Rettenmaier<sup>a,b,‡</sup>, Hao Fan<sup>b,e,f,‡,\*</sup>, Joel Karpiak<sup>a,b</sup>, Allison Doak<sup>b</sup>, Andrej Sali<sup>c</sup>, Brian Shoichet<sup>b</sup>, and

James A. Wells<sup>b,d,\*</sup>

<sup>a</sup>Chemistry and Chemical Biology Graduate Program, <sup>b</sup>Department of Pharmaceutical Chemistry, <sup>c</sup>Department of Bioengineering and Therapeutic Sciences, and <sup>d</sup>Department of Cellular and Molecular Pharmacology, University of California, San Francisco, CA 94158. <sup>e</sup>Bioinformatics Institute (BII), Agency for Science, Technology and Research (A\*STAR), 30 Biopolis Street, Matrix #07-01, Singapore 138671. <sup>f</sup>Department of Biological Sciences, National University of Singapore, 14 Science Drive 4, Singapore 117543.

<sup>‡</sup>Co-first authors contributed equally to the work

<sup>\*</sup>To whom correspondence should be addressed:

jim.wells@ucsf.edu or fanh@bii.a-star.edu.sg

**Supplementary Figure 1.** Six PIF pocket models used for virtual screening.

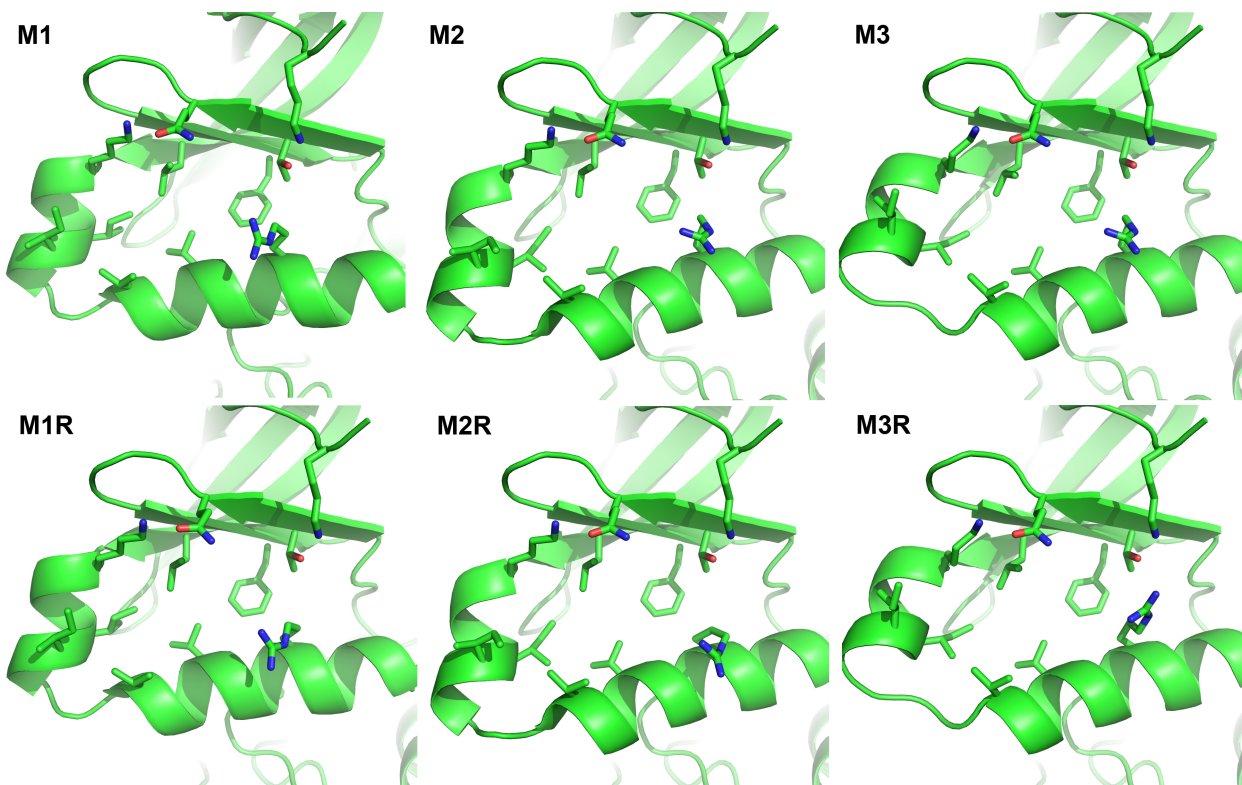

**Supplementary Figure 2.** Experiments to rule out compound aggregation. Dynamic light scattering reveals no formation of colloidal particles by compounds 1, 3, and 4 in the (A) FP competitive binding assay buffer or (B) kinase activity assay buffer. (C) Cruzain enzyme activity assay demonstrates detergent-reversible inhibition by a known small-molecule aggregator, but no effect of compounds 1 and 3. Error bars are SD ( $n = 2$ ).

| A. | sample                 | DLS intensity (kcount/s) | Radius (nm) |
|----|------------------------|--------------------------|-------------|
|    | FP assay buffer        | 16.2                     | 2.4         |
|    | aggregator             | 2066.3                   | 44.0        |
|    | 100 $\mu$ M compound 1 | 20.7                     | 2.8         |
|    | 300 $\mu$ M compound 1 | 27.5                     | 11.2        |
|    | 300 $\mu$ M compound 3 | 12.2                     | 0.6         |
|    | 200 $\mu$ M compound 4 | 21.7                     | 1.4         |

| B. | sample                 | DLS intensity (kcount/s) | Radius (nm) |
|----|------------------------|--------------------------|-------------|
|    | Activity assay buffer  | 11.0                     | 2.0         |
|    | aggregator             | 3376.5                   | 55.7        |
|    | 200 $\mu$ M compound 1 | 16.2                     | 0.8         |
|    | 200 $\mu$ M compound 3 | 12.2                     | 0.6         |
|    | 200 $\mu$ M compound 4 | 76.1                     | 1.5         |

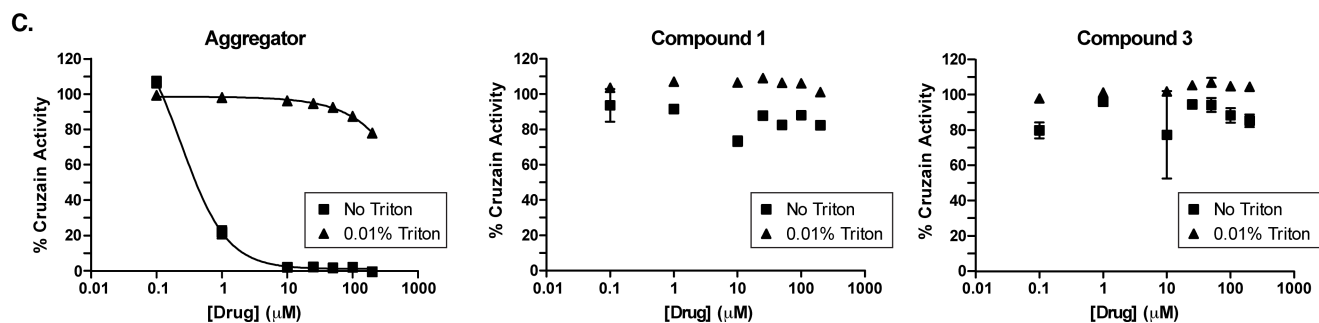

**Supplementary Table 1.** Docking ranks and binding affinities for the 15 PIF pocket ligand analogs.

|    | Compound structure <sup>a</sup> | Docking rank <sup>b</sup> |     |     |     |     |     | $K_d$ $\mu\text{M}^c$<br>(95% CI) | LE <sup>d</sup> |
|----|---------------------------------|---------------------------|-----|-----|-----|-----|-----|-----------------------------------|-----------------|
|    |                                 | M1                        | M1R | M2  | M2R | M3  | M3R |                                   |                 |
| 4  |                                 | 1                         | 9   | 2   | 26  | 15  | 3   | 8.4<br>(7.6-9.1)                  | 0.28            |
| 5  |                                 | 9                         | 45  | 27  | 198 | 72  | 17  | >200                              | -               |
| 6  |                                 | 13                        | 389 | 238 | 410 | 194 | 192 | >200                              | -               |
| 7  |                                 | 15                        | 90  | 24  | 169 | 18  | 34  | >200                              | -               |
| 8  |                                 | 18                        | 433 | 188 | 437 | 108 | 159 | 50<br>(41-60)                     | 0.25            |
| 9  |                                 | 60                        | 375 | 95  | 416 | 80  | 117 | 110<br>(100-120)                  | 0.22            |
| 10 |                                 | 4                         | 1   | 1   | 12  | 29  | 55  | 74<br>(62-87)                     | 0.23            |
| 11 |                                 | 68                        | 363 | 116 | 408 | 71  | 74  | >200                              | -               |

| Compound structure <sup>a</sup>                                                        | Docking rank <sup>b</sup> |     |     |     |     |     | $K_d$ mM <sup>c</sup><br>(95% CI) | LE <sup>d</sup> |
|----------------------------------------------------------------------------------------|---------------------------|-----|-----|-----|-----|-----|-----------------------------------|-----------------|
|                                                                                        | M1                        | M1R | M2  | M2R | M3  | M3R |                                   |                 |
| 12 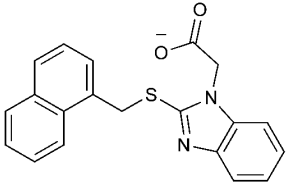   | 5                         | 89  | 6   | 160 | 1   | 9   | 120<br>(100-140)                  | 0.22            |
| 13    | 73                        | 122 | 37  | 170 | 91  | 24  | 120<br>(110-130)                  | 0.24            |
| 14    | 55                        | 232 | 31  | 165 | 16  | 6   | 75<br>(66-85)                     | 0.24            |
| 15   | 65                        | 83  | 223 | 89  | 249 | 53  | 83<br>(76-90)                     | 0.25            |
| 16  | 63                        | 410 | 470 | 2   | 405 | 115 | 150<br>(140-170)                  | 0.25            |
| 17  | 271                       | 306 | 407 | 7   | 466 | 59  | >200                              | -               |
| 18  | 412                       | 221 | 468 | 164 | 455 | 447 | >200                              | -               |

<sup>a</sup> Charged states are depicted assuming a physiological pH of 7.4.

<sup>b</sup> Ranks reported do not consider the molecules discarded by the three geometry filters described in the text.

<sup>c</sup>  $K_d$  was calculated from the  $IC_{50}$  in the FP assay using an equation that accounts for ligand depletion.<sup>1</sup>

<sup>d</sup> Ligand Efficiency (LE) is calculated as experimental binding energy ( $\Delta G$ , kcal/mol) per non-hydrogen atom.

**Supplementary Figure 3.** The docking pose of compound **4** across the 6 PIF pocket models. The docking rank out of 518 analogs is shown at the bottom right of each panel.

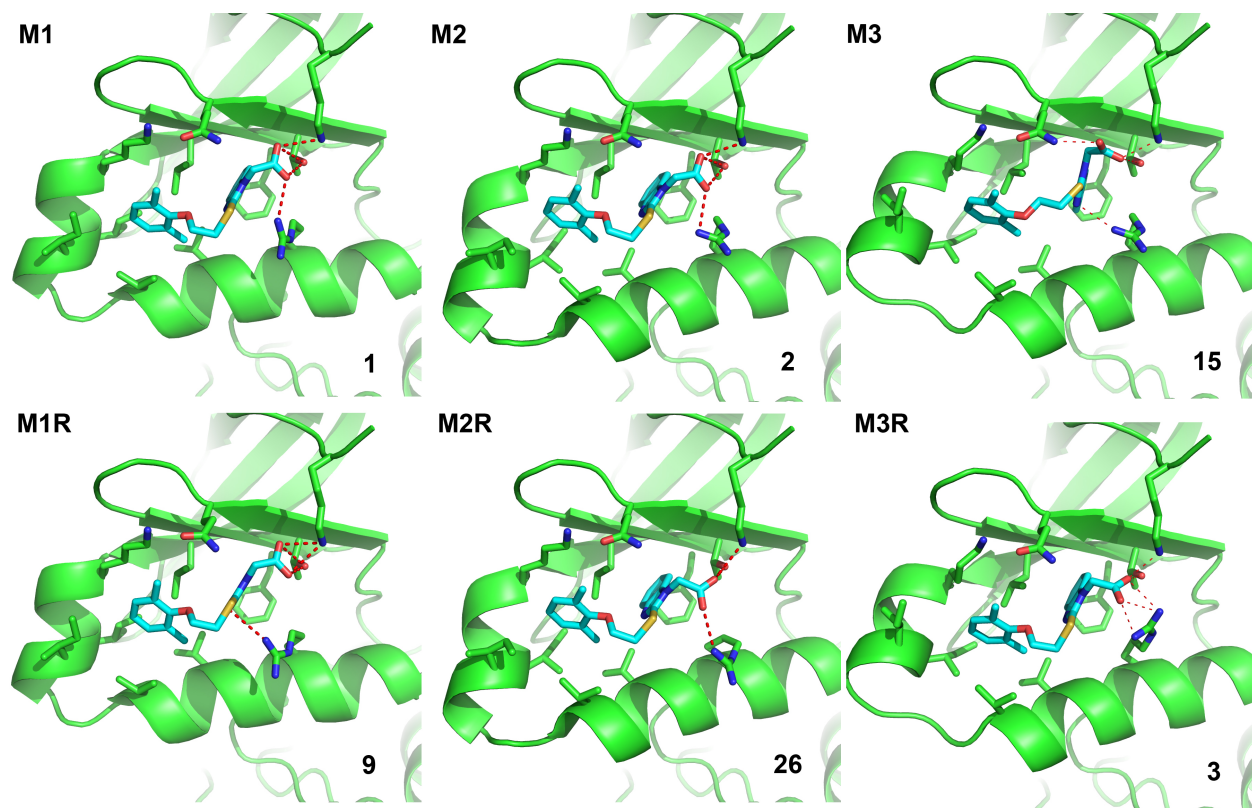

**Supplementary Table 2. Data collection and refinement statistics (molecular replacement)**

|                                                     | <b>PDK1+ATP+RF4<br/>PDB ID: 4XX9</b> |
|-----------------------------------------------------|--------------------------------------|
| <b>Data collection<sup>a</sup></b>                  |                                      |
| Space group                                         | C 1 2 1                              |
| Cell dimensions                                     |                                      |
| <i>a</i> , <i>b</i> , <i>c</i> (Å)                  | 148.3, 44.4, 47.6                    |
| $\alpha$ , $\beta$ , $\gamma$ (°)                   | 90, 101.1, 90                        |
| Resolution (Å)                                      | 46.75-1.40 (1.45-1.40)               |
| <i>R</i> <sub>merge</sub>                           | 0.065 (0.828)                        |
| <i>I</i> / $\sigma$                                 | 18.9 (1.92)                          |
| Completeness (%)                                    | 99.7 (99.6)                          |
| Redundancy                                          | 3.8 (3.6)                            |
| <b>Refinement</b>                                   |                                      |
| Resolution (Å)                                      | 1.40 (1.45-1.40)                     |
| No. reflections                                     | 59563 (5875)                         |
| <i>R</i> <sub>work</sub> / <i>R</i> <sub>free</sub> | 12.9 / 16.5                          |
| No. atoms                                           | 5294                                 |
| Protein                                             | 4880                                 |
| Ligand/ion                                          | 138                                  |
| Water                                               | 276                                  |
| Average <i>B</i> factors (Å <sup>2</sup> ):         |                                      |
| Protein                                             | 21.3                                 |
| Ligand/ion                                          | 30.6                                 |
| Water                                               | 33.6                                 |
| R.m.s. deviations:                                  |                                      |
| Bond lengths (Å)                                    | 0.012                                |
| Bond angles (°)                                     | 1.468                                |
| Ramachandran statistics <sup>b</sup> (%):           |                                      |
| Favored                                             | 98.3                                 |
| Allowed                                             | 1.7                                  |
| Outliers                                            | 0                                    |

<sup>a</sup>Values in parentheses are for highest-resolution shell. <sup>b</sup>As calculated by Molprobit.
